# Supplementary material
Source: publisher figshare collection journal article supplement (https://gsajournals.figshare.com/ndownloader/files/22364175)
Supplement: Supplementary file 1 [file 22364175]

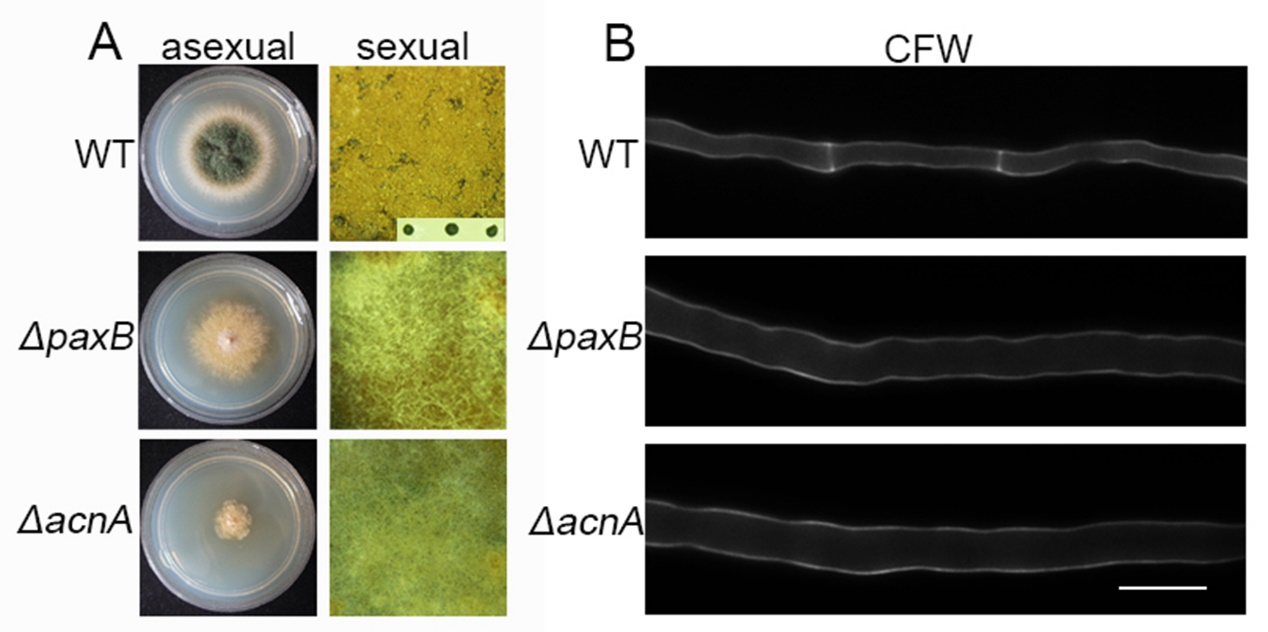


**Figure S3. PaxB and α-actinin were required for asexual and sexual reproduction and septation.** (A) Colony morphologies of the wild-type (TN02A7), *ΔacnA* (WJ03) and *ΔpaxB* (AAV127)strains grown on rich YUU medium at 37°C for 2.5 days. (B) Comparisons of cleistothecium development having ascospores or not during self-fertilization in the wild-type (R21) strain and the *ΔacnA* (WJ03) and the *ΔpaxB* (AAV127)mutants. (C) Septa comparison in hyphal cells stained with CFW in the indicated strainscultured in liquid rich YUU media at 37°C for 20 h. Bars, 10 µm.
